# Supplementary material
Source: Springer Nature journal article supplement (https://www.springermedizin.de/resource/supplementary/12875_2012_730_MOESM2_ESM.pdf/9435290)

Records identified through  
database searching  
(n=2316)

Additional records identified  
through other sources  
(n=1)

Records after duplicates removed  
(n =1,571)

Records screened  
(n=1,571)

Records excluded  
(n=1,540)

Full-text articles assessed  
for eligibility  
(n=31)

**Full-text articles excluded**  
(n=13)  
Systematic review (n=2)  
Review article (n=5)  
Not validating STRATIFY  
(n=3)

Studies included in  
qualitative synthesis  
(n=18)

Studies included in  
quantitative synthesis  
(meta-analysis)  
(n =16)

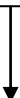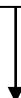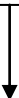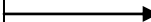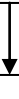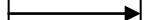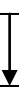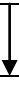

Supplement: MOESM2 [file 9435290]
